# Supplementary material for: RNA-Seq Analysis Reveals Genes Related to Photoreception, Nutrient Uptake, and Toxicity in a Noxious Red-Tide Raphidophyte Chattonella antiqua
Source: Front Microbiol. 2019 Jul 31;10:1764. doi: 10.3389/fmicb.2019.01764 (PMC6685483; doi:10.3389/fmicb.2019.01764)
Supplement: Supplementary file 2 [file Data_Sheet_-1.xlsx]

## Sheet: Chlorophyll
Supplementary data 1: The list of Gene IDs (biosynthesis of pigments)
Enzyme	Abbreviation	EC number	Gene location	Reference ID (Arabidopsis)	Arabidopsis ortholog	Chlamydomonas ortholog	Chattonella antiqua			Chattonella subsalsa			Heterosigma akashiwo			Heterocapsa circularisquama			Karenia mikimotoi
							ID	E-value	Identity (%)	ID	E-value	Identity (%)	ID	E-value	Identity (%)	ID	E-value	Identity (%)	ID	E-value	Identity (%)
Glutamyl-tRNA synthetase	GTS	6.1.1.17	Nuclear genome	AT5G26710	AT1G25350	CHLREDRAFT_195543	Chaan_18411	e-155	44	Chasu_16398	1e-163	44	Hetak_4548	1e-150	51	86302	e-108	57	NF
					(Chaan_17215)	-
Glutamyl-tRNA reductase	GTR	1.2.1.70	Nuclear genome	AT2G31250	AT1G09940	CHLREDRAFT_183460	Chaan_13967	8e-67	36	Chasu_16957	1e-66	36	Hetak_4446	2e-62	33	22818	5e-54	31	27315	8e-55	30
					AT1G58290														14297	2e-56	31
Glutamate-1-semialdehyde 2,1-aminomutase	GSA	5.4.3.8		AT3G48730	AT5G63570	CHLREDRAFT_138524	Chaan_26045	e-171	67	Chasu_17495	1e-172	67	Hetak_20989	1e-172	70	31655	1e-173	69	19603	E-176	70
																			19036	1e-175	70
																			3391	1e-175	69
																			40014	1e-169	66
Porphobilinogen synthase/Aminolevulinate dehydratase	ALAD	4.2.1.24	Nuclear genome	AT1G44318	AT1G69740	CHLREDRAFT_186639	Chaan_21103	6e-81	50	Chasu_6803	2e-82	51	Hetak_23125	2e-80	50	NF			10411	8e-84	50
																			67248	8e-76	50
Hydroxymethylbilane synthase/Porphobilinogen deaminase	HemC/PBGD	2.5.1.61	Nuclear genome	AT5G08280		CHLREDRAFT_166608	Chaan_22109	e-106	63	Chasu_19486	1e-106	64	Hetak_7484	1e-103	62	31182	9e-85	52	16798	1e-93	57
						CHLREDRAFT_194475
Hydroxymethylbilane hydro-lyase (cyclizing)/Uroporphyrinogen-III synthase	HemD/UROS	4.2.1.75	Nuclear genome	AT2G26540		CHLREDRAFT_195943	Chaan_19219	2e-42	41	Chasu_17392	8e-21	38	Hetak_28138	9e-42	41	NF			67058	1e-29	39
Uroporphyrinogen III decarboxylase	UROD	4.1.1.37	Nuclear genome	AT3G14930	AT2G40490	CHLREDRAFT_132194	Chaan_10243	8e-99	48	Chasu_20118	1e-100	49	Hetak_20871	2e-96	48	50567	3e-70	39	15623	2e-83	44
						CHLREDRAFT_186446	Chaan_18865	2e-86	43	Chasu_18589	4e-84	43	Hetak_6777	1e-80	43				81940	1e-39	53
						CHLREDRAFT_195818
Coproporphyrinogen-III oxidase	CPX1	1.3.3.3	Nuclear genome	AT1G03475	AT4G03205	CHLREDRAFT_53583	Chaan_12054	e-115	62	Chasu_21224	1e-117	63	Hetak_14925	1e-112	60	30259	1e-102	56	45238	1e-103	52
Protoporphyrinogen IX oxidase	PPX	1.3.3.4	Nuclear genome	AT4G01690	AT5G14220	CHLREDRAFT_191043	Chaan_15304	5e-89	39	Chasu_16192	1e-114	48	Hetak_21380	3e-96	42	85752	1e-130	52	35125	1e-123	49
																			29886	4e-92	38
Protoporphyrin IX magnesium-chelatase, subunit D	ChlD	6.6.1.1	Nuclear genome	AT1G08520		CHLREDRAFT_134594	Chaan_25567	1e-91	54	Chasu_1882	4e-92	55	Hetak_4815	2e-90	53	23588	2e-86	48	72248	2e-59	52
																			30184 (C-terminal)	7e-80	53
Protoporphyrin IX magnesium-chelatase, subunit I	ChlI	6.6.1.1	Nuclear genome	AT4G18480		CHLREDRAFT_135762	NF			Chasu_5101_c0_g1_i1_m8067			NF			31135			NF
				AT5G45930
Protoporphyrin IX magnesium-chelatase, subunit H	ChlH	6.6.1.1	Nuclear genome	AT5G13630		CHLREDRAFT_195524	Chaan_27442	0	57	Chasu_17682	0	62	Hetak_21537	0	60	32358	3e-67	47	5521	0	63
																29285		66	7945	0	63
Magnesium protoporphyrin IX methyltransferase	PPMT(ChlM)	2.1.1.11	Nuclear genome	AT4G25080		CHLREDRAFT_195575	Chaan_12020	6e-63	52	Chasu_6313	4e-64	53	Hetak_3545	7e-66	54	28601	3e-75	62	14186	3e-61	52
Divinyl chlorophyllide a 8-vinyl-reductase	DVR	1.3.1.75	Nuclear genome	AT5G18660		CHLREDRAFT_195952	Chaan_17221	2e-75	47	Chasu_21015	2e-75	45	Hetak_21364	3e-74	44	49801	2e-91	52	34201	2e-71	44
										Chasu_15775	9e-74	45	Hetak_18664	3e-71	43
Protochlorophyllide reductase A-C	por A	1.3.1.33	Nuclear genome	AT5G54190		CHLREDRAFT_136589	Chaan_22611	7e-73	50	Chasu_13155	4e-82	62	Hetak_28025	2e-76	46	17558	2e-26	61	56611	4e-70	46
	por B				AT4G27440								Hetak_19685_c0_g2_i1_m17204	1e-40	43				22484	4e-66	47
	por C				AT1G03630														26573	1e-52	36
																			24970	1e-54	47
Chlorophyll synthase	CHS (ChlG)	2.5.1.62	Nuclear genome	AT3G51820		CHLREDRAFT_5437	Chaan_22923	1e-116	55	Chasu_16163	1e-116	60	Hetak_20277	1e-114	60	c15039	6e-94	54	NF

## Sheet: Carotenoid
Enzyme	Abbreviation	EC number	Gene location	Reference ID (Arabidopsis)	Other orthologs of Arabidopsis	Chlamydomonas ortholog	Chattonella antiqua			Chattonella subsalsa			Heterosigma akashiwo			Heterocapsa circularisquama			Karenia mikimotoi
							ID	E-value	Identity (%)	ID	E-value	Identity (%)	ID	E-value	Identity (%)	ID	E-value	Identity (%)	ID	E-value	Identity (%)
Non-mevalonate pathway
1-deoxy-D-xylulose-5-phosphate synthase	DXS	2.2.1.7	Nuclear genome	AT4G15560	AT3G21500	CHLREDRAFT_196568	Chaan_9820	0	52	Chasu_16686	0	51	Hetak_21225	0	52	31110	1e-167	49	49372	1e-148	51
																			32022	1e-131	48
																			22789	1e-115	51
1-deoxy-D-xylulose-5-phosphate reductoisomerase	DXR	1.1.1.267	Nuclear genome	AT5G62790		CHLREDRAFT_196606	Chaan_15870	1e-135	61	Chasu_18157	1e-133	61	Hetak_26728	1e-135	60	47911	1e-116	55	9452	1e-115	55
2-C-methyl-D-erythritol 4-phosphate cytidylyltransferase	CMS	2.7.7.60	Nuclear genome	AT2G02500		CHLREDRAFT_196604	Chaan_15300	9e-59	51	Chasu_6793	3e-58	52	Hetak_28316	8e-56	50	74781	9e-50	47	44498	8e-40	56
4-(cytidine 5'-diphospho)-2-C-methyl-D-erythritol kinase	CMK	2.7.1.148	Nuclear genome	AT2G26930		CHLREDRAFT_137673	Chaan_10703	8e-53	38	Chasu_14210	2e-52	38	Hetak_20287	4e-51	45	54774	9e-47	42	26751	1e-41	41
2-C-methyl-D-erythritol 2,4-cyclodiphosphate synthase	MDS	4.6.1.12	Nuclear genome	AT1G63970		CHLREDRAFT_109429	Chaan_11326	1e-48	58	Chasu_18730	3e-49	58	Hetak_20404	8e-49	58	74070	2e-37	46	24148	5e-36	48
						CHLREDRAFT_188593
(E)-4-hydroxy-3-methylbut-2-enyl-diphosphate synthase (ferredoxin)	HDS	1.1.7.1	Nuclear genome	AT5G60600		CHLREDRAFT_55268	Chaan_18279	0	59	Chasu_18080	0	58	Hetak_14480	1e-154	61	31209	1e-159	48	11646	1e-156	47
																20904			48257	8e-46	53
																			56401	3e-59	51
																			85264	5e-45	52
4-hydroxy-3-methylbut-2-enyl diphosphate reductase	HDR	1.17.1.4	Nuclear genome	AT4G34350		CHLREDRAFT_59822	Chaan_8738	1e-124	55	Chasu_15099	1e-119	52	Hetak_28374	1e-119	52	31302	1e-114	46	36598	1e-103	47
																24651	1e-113	46
Phytoene biosynthesis
Dimethylallyltranstransferase	-	2.5.1.1	Nuclear genome	AT5G47770	AT4G17190	CHLREDRAFT_137019	Chaan_5994	2e-86	44	Chasu_17085	1e-89	47	Hetak_3874	2e-85	45	48955	2e-74	41	22301	1e-75	43
																4122	5e-33	41
Geranylgeranyl diphosphate synthase	GGPPS (CrtE)	2.5.1.29	Nuclear genome	AT4G36810	AT4G38460	CHLREDRAFT_195038	Chaan_17319	3e-81	53	Chasu_16501	8e-84	54	Hetak_18803	2e-80	53	14793	2e-24	32	13554	5e-75	50
					AT2G23800
					AT3G14550
					AT2G18640
					AT1G49530
					AT2G18620
					AT3G14510
					AT3G14530
					AT3G20160
					AT3G29430
					AT3G32040
Squalene synthase		2.5.1.21	Nuclear genome	AEE86403			Chaan	3e-71	41	Chasu_17685	8e-77	44	Hetak_21414	6e-73	44	34520	1e-60	40	43284	1e-56	37
15-cis-phytoene synthase	PSase	2.5.1.32	Nuclear genome	AT5G17230		CHLREDRAFT_59715	Chaan_13820_c0_g1_i1_m10317	1e-79	44	Chasu_7197	2e-81	51	Hetak_28088	1e-73	49	31853	3e-72	46	36348	1e-67	40
																			32931	8e-66	41
																			45766	3e-63	49
Lycopene biosynthesis
15-cis-phytoene desaturase	PDS	1.3.5.5	Nuclear genome	AT4G14210		CHLREDRAFT_78128	Chaan_13373_c0_g1_i1_m27242	0	63	Chasu_15577	1e-120	65	Hetak_13098	1e-175	61	11412	1e-123	53	17502	1e-152	53
				-		-													32448	3e-52	30
																			94589	8e-43	54
9,9'-di-cis-zeta-carotene desaturase	ZDS	1.3.5.6	Nuclear genome	AT3G04870		CHLREDRAFT_182457	Chaan_15303_c0_g1_i1_m7673	1e-165	58	Chasu_18762	1e-163	56	Hetak_24615	1e-152	53	31248	5e-58	30	32448	1e-158	56
																11412	9e-39	30
Xanthophyll cycle
Lycopene beta-cyclase		5.5.1.19	Nuclear genome	AT3G10230	AT5G57030	CHLREDRAFT_187094	Chaan_15738_c0_g1_i1_m21349	4e-59	38	Chasu_18520	6e-56	35	Hetak_21640	9e-38	29	16668*	1e-20	40	37773*	2e-17	30
																42200*	2e-05	34
Beta-carotene 3-hydroxylase	BCH	1.14.13.129	Nuclear genome	NP_194300 (=At4g25700 )	AT5G52570	CHLREDRAFT_164400	NF			NF			NF			NF			NF
Cytochrome P450 enzymes	CYP97		Nuclear genome	NP_190881	AT1G31800	CHLREDRAFT_196717	Chaan_10085_c0_g1_i1_m5297	3e-36	26	Chasu_14003	9e-36	26	Hetak_21235	e-100	42	31853	8e-81	36	19878	9e-85	36
(Lutein deficient-like)	(LTL)			(=AT3G53130)	AT2G26170	CHLREDRAFT_196718	Chaan_14572_c0_g1_i1_m16475	3e-12	25	Chasu_18534	e-104	43	Hetak_21434	2e-23	31	45507	3e-89	38
					AT2G28850	CHLREDRAFT_196719	Chaan_24213_c0_g2_i1_m6952	6e-57	46	Chasu_19646	e-100	40	Hetak_21507	4e-08	27	82269	1e-27	25
					AT2G28860	CHLREDRAFT_196730	Chaan_26024_c0_g1_i1_m27631	e-100	40				Hetak_3023	e-102	42
					AT2G34490	CHLREDRAFT_196742
					AT2G34500	CHLREDRAFT_196744
					AT3G53130	CHLREDRAFT_196874
					AT4G15110
Zeaxanthin epoxidase	ZEP	1.14.13.90	Nuclear genome	AT5G67030		CHLREDRAFT_53522	Chaan_18250_c0_g1_i1_m33084	4e-64	43	Chasu_12760	3e-68	42	Hetak_11565	2e-62	43	c11775	2e-55	38	11792	1e-63	41
										Chasu_17189	3e-64	43							46659	1e-52	36
Violaxanthin de-epoxidase	VDE	1.23.5.1	Nuclear genome	AT1G08550		-	Chaan_14205_c0_g1_i1_m49944	1e-89	55	Chasu_16256	6e-89	55	Hetak_16096	3e-88	56	c29335	5e-70	50	28473	1e-82	42
							Chaan_15222_c0_g1_i1_m6105	1e-50	39
							Chaan_16744_c0_g2_i1_m15783	1e-50	39
Neoxanthin synthase	NSY	5.3.99.9	Nuclear genome	XP_013451304			NF			Chasu_21016	2e-16		NF			NF			NF
Cytochrome P450 (plastid carotenoid epsilon-ring hydroxylase)	Haecyp97c	-	Nuclear genome	AGT63110			comp11746_c0_seq1	2e-97		Chasu_18534	9e-99		Hetak_3023	1e-100		c45507	4e-90		19878	5e-85	5e-85
							comp12138_c0_seq1	5e-92		Chasu_19646	3e-94		Hetak_21235	2e-96		c31853	1e-71
							comp19071_c0_seq1	2e-82
*partial							Min	0	25
Homolog but not ortholog							Max	3e-12	63
Homolog
